# Supplementary material for: What works for whom in compassion training programs offered to practicing healthcare providers: a realist review
Source: PubMed Central journal article supplement (PMC8403363; doi:10.1186/s12909-021-02863-w), 2021-08-28

# Additional file 1: Search strategy

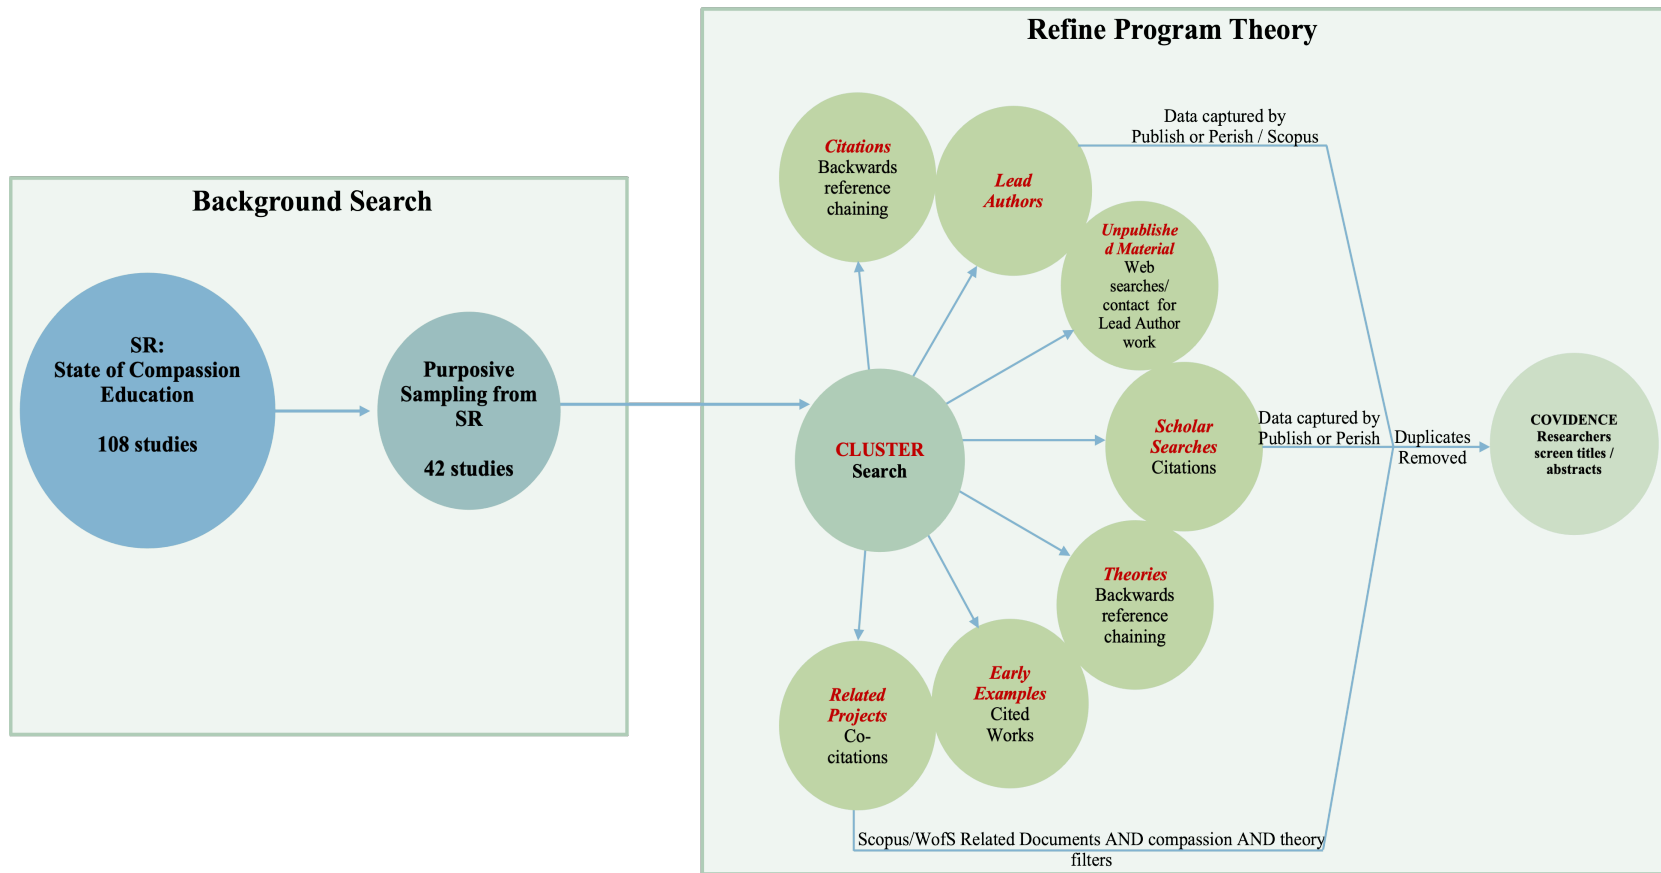

Supplement: 12909_2021_2863_MOESM1_ESM.pdf [file 12909_2021_2863_MOESM1_ESM.pdf]
