# Supplementary material for: What works for whom in compassion training programs offered to practicing healthcare providers: a realist review
Source: PubMed Central journal article supplement (PMC8403363; doi:10.1186/s12909-021-02863-w), 2021-08-28
Supplement: 12909_2021_2863_MOESM5_ESM.pdf [file 12909_2021_2863_MOESM5_ESM.pdf]

## Additional file 5: Summary of Contexts, Mechanisms, and Outcomes

| <b>Contexts</b>                                                         |                                               | <b>N*</b> | <b>References</b>                                                                                                                                                                                                                                                                              |
|-------------------------------------------------------------------------|-----------------------------------------------|-----------|------------------------------------------------------------------------------------------------------------------------------------------------------------------------------------------------------------------------------------------------------------------------------------------------|
| Setting.                                                                | Mixed.                                        | 14        | 64; 65; 70; 79; 80; 81; 82; 85; 98; 99; 101; 103; 105; 107;                                                                                                                                                                                                                                    |
|                                                                         | Acute care.                                   | 11        | 18; 67; 68; 69; 70; 71; 72; 88; 93; 94; 95;                                                                                                                                                                                                                                                    |
|                                                                         | Palliative care.                              | 7         | 77; 86; 89; 90; 91; 100; 106;                                                                                                                                                                                                                                                                  |
|                                                                         | Primary care.                                 | 4         | 76; 78; 87; 102;                                                                                                                                                                                                                                                                               |
|                                                                         | Mental health.                                | 4         | 74; 83; 84; 97;                                                                                                                                                                                                                                                                                |
|                                                                         | Elderly care.                                 | 3         | 66; 92; 104;                                                                                                                                                                                                                                                                                   |
|                                                                         | High-risk populations.                        | 1         | 96;                                                                                                                                                                                                                                                                                            |
|                                                                         | Care home.                                    | 1         | 73;                                                                                                                                                                                                                                                                                            |
|                                                                         | Oncology.                                     | 1         | 75;                                                                                                                                                                                                                                                                                            |
| Healthcare provider.                                                    | Nurse.                                        | 24        | 18; 65; 67; 68; 69; 70; 71; 72; 73; 74; 75; 81; 82; 84; 88; 89; 90; 91; 93; 94; 95; 98; 101; 103;                                                                                                                                                                                              |
|                                                                         | Clinician.                                    | 6         | 76; 78; 87; 97; 100; 102;                                                                                                                                                                                                                                                                      |
|                                                                         | Multidisciplinary.                            | 15        | 64; 66; 77; 79; 80; 83; 85; 86; 92; 96; 99; 104; 105; 106; 107;                                                                                                                                                                                                                                |
| Healthcare system contexts.                                             | Need for an integrated approach to care.      | 20        | 18; 67; 68; 69; 70; 71; 72; 73; 74; 75; 88; 92; 94; 95; 98; 101; 104; 105; 106; 107;                                                                                                                                                                                                           |
| Healthcare provider contexts.                                           | Need to nurture innate compassion.            | 16        | 64; 66; 74; 75; 89; 90; 91; 96; 97; 99; 100; 101; 102; 103; 104; 105;                                                                                                                                                                                                                          |
|                                                                         | Need for stress-reduction.                    | 15        | 65; 66; 76; 77; 78; 79; 80; 81; 82; 83; 84; 85; 86; 87; 104;                                                                                                                                                                                                                                   |
|                                                                         | Need to improve clinical competence.          | 7         | 74; 90; 91; 92; 93; 97; 99;                                                                                                                                                                                                                                                                    |
| <b>Mechanisms</b>                                                       |                                               | <b>N*</b> | <b>References</b>                                                                                                                                                                                                                                                                              |
| <b>Resource</b>                                                         |                                               |           |                                                                                                                                                                                                                                                                                                |
| Work-based educational models.                                          | Development of leadership and team practices. | 12        | 18; 67; 68; 69; 70; 71; 72; 73; 92; 94; 95; 106;                                                                                                                                                                                                                                               |
| Participatory interventions supporting individual healthcare providers. | Professional development.                     | 17        | <i>Evidence-based curricula:</i> 74; 90; 91; 93; 96; 107;<br><i>Clinical instruction and community service:</i> 98;<br><i>Role playing and simulation:</i> 75; 89; 97;<br><i>Vignettes:</i> 99;<br><i>Reflective practices:</i> 100; 101; 102; 103;<br><i>Complementary therapies:</i> 64; 88; |
|                                                                         | Coping and resilience skills.                 | 17        | <i>Rounds:</i> 104; 105;<br><i>Complementary therapies:</i> 65; 79; 88;                                                                                                                                                                                                                        |

|                      |                                                    |    |                                                                                                                                                                                           |
|----------------------|----------------------------------------------------|----|-------------------------------------------------------------------------------------------------------------------------------------------------------------------------------------------|
|                      |                                                    |    | <i>Contemplative therapies:</i> 66; 76; 77; 78; 80; 81; 82; 83; 84; 86; 87; 85;                                                                                                           |
| <b>Reasoning</b>     |                                                    |    |                                                                                                                                                                                           |
| Teaching mechanisms. | Highly qualified program leaders and facilitators. | 28 | <i>Facilitator:</i> 18; 65; 67; 68; 69; 71; 72; 73; 76; 77; 78; 79; 82; 83; 84; 85; 87; 91; 92; 93; 94; 95; 97; 101; 105; 106; 107;<br><br><i>Barrier:</i> 104;                           |
|                      | Team learning activities.                          | 15 | <i>Facilitator:</i> 18; 67; 68; 69; 70; 71; 72; 73; 85; 88; 92; 94; 95;<br><br><i>Barrier:</i> 72; 92;                                                                                    |
|                      | Continuous learning.                               | 36 | <i>Facilitator:</i> 18; 64; 65; 67; 68; 69; 70; 71; 72; 73; 77; 78; 79; 80; 81; 82; 85; 87; 88; 94; 95; 106;<br><br><i>Barrier:</i> 18; 64; 66; 67; 68; 74; 82; 84; 92; 94; 96; 104; 106; |
|                      | Staff empowerment.                                 | 17 | <i>Facilitator:</i> 18; 67; 68; 69; 70; 71; 72; 73; 76; 77; 85; 94; 95; 106;<br><br><i>Barrier:</i> 67; 68; 94;                                                                           |
|                      | Education in context.                              | 22 | <i>Facilitator:</i> 18; 67; 68; 69; 70; 71; 72; 73; 74; 77; 78; 82; 87; 89; 93; 94; 95; 98; 104; 106;<br><br><i>Barrier:</i> 18; 104;                                                     |
|                      | Contemplative practices.                           | 13 | <i>Facilitator:</i> 66; 76; 77; 78; 80; 81; 82; 83; 84; 85; 86; 87;<br><br><i>Barrier:</i> 84;                                                                                            |
|                      | Discussion.                                        | 25 | <i>Facilitator:</i> 18; 67; 68; 69; 70; 71; 72; 73; 74; 75; 82; 83; 87; 89; 92; 94; 95; 96; 97; 98; 103; 104; 105; 106;<br><br><i>Barrier:</i> 92;                                        |
|                      | Case-based scenarios.                              | 2  | <i>Facilitator:</i> 91; 93;                                                                                                                                                               |
|                      | Simulation and role play.                          | 9  | <i>Facilitator:</i> 75; 89; 92; 93; 97; 99;<br><br><i>Barrier:</i> 75; 89; 92;                                                                                                            |
|                      | Patient storytelling.                              | 1  | <i>Facilitator:</i> 101;                                                                                                                                                                  |
|                      | Didactic lectures.                                 | 4  | <i>Facilitator:</i> 85; 90; 93; 96;                                                                                                                                                       |
|                      | Video/audio taping.                                | 3  | <i>Facilitator:</i> 89; 92; 97;                                                                                                                                                           |

|                            |                                                                          |    |                                                                                                                                                 |
|----------------------------|--------------------------------------------------------------------------|----|-------------------------------------------------------------------------------------------------------------------------------------------------|
|                            | Multimodal approach.                                                     | 8  | <i>Facilitator:</i> 64; 84; 85; 90; 93; 96; 98; 107;                                                                                            |
| Learning mechanisms.       | Group participation.                                                     | 16 | <i>Facilitator:</i> 18; 69; 70; 71; 72; 73; 76; 78; 79; 82; 87; 88; 92; 97; 103; 105;                                                           |
|                            | Feedback.                                                                | 11 | <i>Facilitator:</i> 18; 67; 68; 69; 70; 72; 73; 82; 92; 94; 95;                                                                                 |
|                            | Recognition and sharing of positive practices.                           | 3  | <i>Facilitator:</i> 70; 72; 73;                                                                                                                 |
|                            | Reflection.                                                              | 24 | <i>Facilitator:</i> 18; 66; 67; 68; 69; 70; 71; 72; 73; 75; 86; 89; 92; 94; 95; 98; 101; 102; 103; 104; 105;<br><i>Barrier:</i> 76; 97; 104;    |
|                            | Discussion.                                                              | 25 | <i>Facilitator:</i> 18; 67; 68; 69; 70; 71; 72; 73; 74; 75; 82; 83; 87; 89; 92; 94; 95; 96; 97; 101; 103; 104; 105; 106;<br><i>Barrier:</i> 92; |
|                            | Mentoring.                                                               | 2  | <i>Facilitator:</i> 88; 106;                                                                                                                    |
|                            | Experiential/hands-on learning.                                          | 8  | <i>Facilitator:</i> 64; 69; 70; 71; 75; 92; 97; 98;<br><i>Barrier:</i> 64; 75;                                                                  |
|                            | Critical thinking and problem solving.                                   | 7  | <i>Facilitator:</i> 69; 70; 71; 75; 90; 93; 96;<br><i>Barrier:</i> 75;                                                                          |
|                            | Linking theory to practice.                                              | 4  | <i>Facilitator:</i> 69; 70; 71;<br><i>Barrier:</i> 84;                                                                                          |
| Organizational mechanisms. | Integration of activities with the priorities of the wider organization. | 17 | <i>Facilitator:</i> 18; 69; 72; 73; 84; 85; 98;<br><i>Barrier:</i> 64; 67; 68; 70; 79; 84; 94; 95; 104; 106;                                    |
|                            | Time efficient.                                                          | 10 | <i>Facilitator:</i> 76; 77; 78; 83; 86; 87; 96; 104;<br><i>Barrier:</i> 81; 106;                                                                |
|                            | Flexibility in programing.                                               | 6  | <i>Facilitator:</i> 79; 80; 84; 92; 107;<br><i>Barrier:</i> 64;                                                                                 |
|                            | Cost effective.                                                          | 8  | <i>Facilitator:</i> 76; 79; 85; 86; 107;<br><i>Barrier:</i> 81; 92; 104;                                                                        |

|                               |                                           |           |                                                                                                                                                       |
|-------------------------------|-------------------------------------------|-----------|-------------------------------------------------------------------------------------------------------------------------------------------------------|
|                               | Course credits and cash/prize incentives. | 9         | <i>Facilitator:</i> 64; 79; 82; 83; 87; 90; 99; 107;<br><i>Barrier:</i> 80;                                                                           |
| <b>Outcomes**</b>             |                                           | <b>N*</b> | <b>References</b>                                                                                                                                     |
| Program outcomes.             | K1 Reactions.                             | 23        | 64; 66; 67; 68; 69; 70; 71; 74; 77; 79; 82; 84; 85; 87; 90; 92; 94; 95; 97; 101; 102; 104; 106;                                                       |
| Healthcare provider outcomes. | K2a Attitudes.                            | 36        | 18; 65; 66; 67; 68; 69; 70; 71; 73; 75; 76; 77; 78; 79; 81; 82; 83; 84; 85; 86; 87; 88; 89; 90; 92; 94; 95; 96; 97; 99; 100; 101; 102; 104; 105; 107; |
|                               | K2b Knowledge and skills.                 | 13        | 69; 70; 71; 74; 84; 87; 88; 89; 90; 93; 98; 103; 106;                                                                                                 |
|                               | K3 Behaviors.                             | 15        | 18; 64; 72; 73; 77; 78; 79; 80; 85; 87; 91; 92; 102; 104; 105;                                                                                        |
| Healthcare system outcomes.   | K4a Changes to clinical processes.        | 1         | 85;                                                                                                                                                   |
|                               | K4b Benefits to patients.                 | 11        | 64; 67; 68; 74; 78; 84; 85; 88; 94; 95; 106;                                                                                                          |

\*N= number of references

\*\*Outcomes are intended and unintended consequences – K1 Reactions: Reactions and satisfaction with training (How much did they like it? How did participants react to it?); K2a Attitudes: Did attitudes change?; K2b Knowledge and skills: Did they learn anything? Did the authors use any established instruments to measure changes in knowledge; K3 Behaviors: Did the program or curriculum change their behaviors at all? Or future behaviors?; K4a Changes to clinical processes: Did the program or curriculum lead to any improvements to clinical processes; K4b Benefits to patients: Did the program or curriculum lead to any improvements to patients?
